# Supplementary material
Source: MDPI journal article supplement (https://www.mdpi.com/2073-445X/12/5/1078)

## Supplemental Information

**Figure S1:** Area of counties implementing the GFGP (a) Areas converted from farmland to grassland on L01-10 (b) Areas converted from farmland to grassland on L11-20 (c) Areas converted from farmland to forest and shrubland on L01-10 (d) Areas converted from farmland to forest and shrubland on L11-20

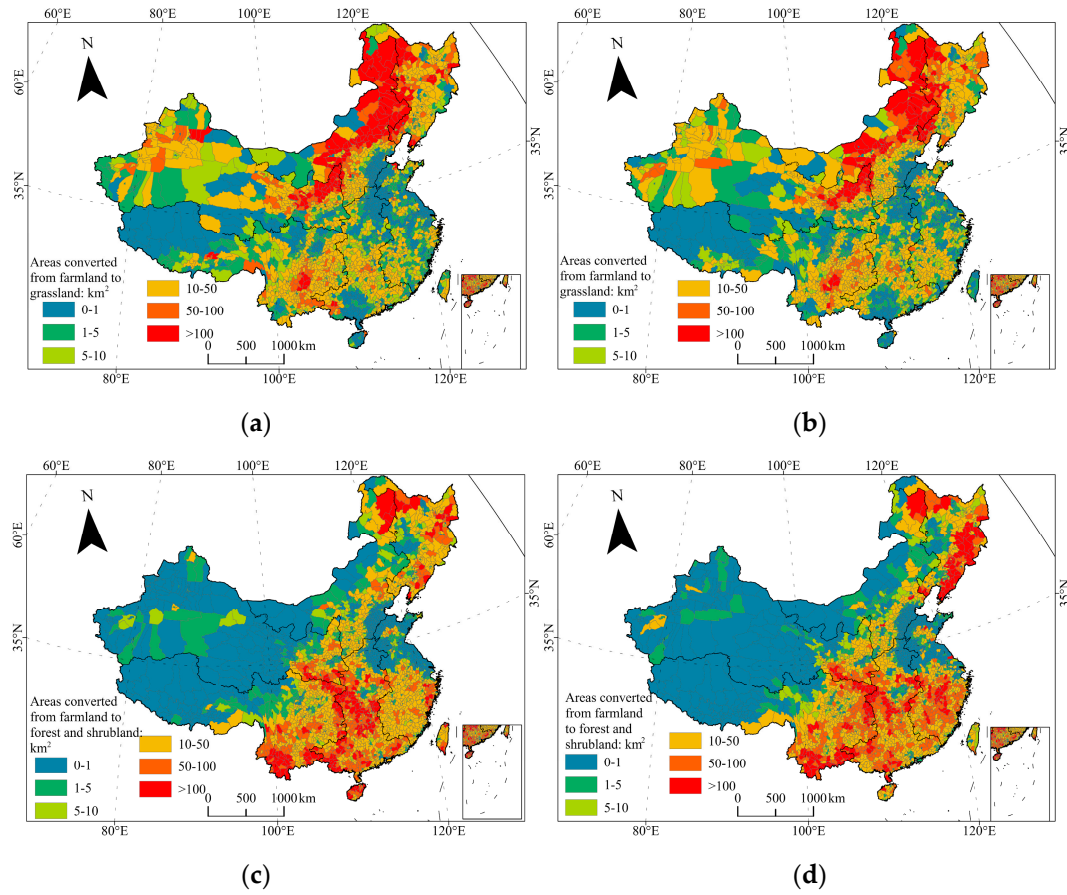

**Table S1:** Significance test for variation trend of NPP based on  $\beta$  and Z

| Sen trend degree | Mann-Kendall trend test | Trend Categories | Trend Significance              |
|------------------|-------------------------|------------------|---------------------------------|
| $\beta > 0$      | $2.58 < Z$              | 4                | Extremely significant increase  |
|                  | $1.96 < Z \leq 2.58$    | 3                | Significant increase            |
|                  | $1.65 < Z \leq 1.96$    | 2                | Slightly significant increase   |
|                  | $Z \leq 1.65$           | 1                | No significant increase         |
| $\beta = 0$      | Z                       | 0                | No change                       |
| $\beta < 0$      | $Z \leq 1.65$           | -1               | No significant reduction        |
|                  | $1.65 < Z \leq 1.96$    | -2               | Slightly significant reduction  |
|                  | $1.96 < Z \leq 2.58$    | -3               | Significant reduction           |
|                  | $2.58 < Z$              | -4               | Extremely significant reduction |

**Table S2:** Total NPP for vegetation on fallow land in six regions from 2011 to 2020

| Types of<br>farmland-<br>converted lands | year | Annual NPP (GgC·year <sup>-1</sup> ) |           |           |           |           |           |
|------------------------------------------|------|--------------------------------------|-----------|-----------|-----------|-----------|-----------|
|                                          |      | NE                                   | NW        | SW        | SC        | E         | N         |
| L01-10                                   | 2011 | 9461.97                              | 8472.94   | 25,137.94 | 26,454.68 | 11,674.56 | 13,075.41 |
|                                          | 2012 | 10,343.80                            | 9167.68   | 23,771.45 | 26,419.12 | 12,144.40 | 14,685.45 |
|                                          | 2013 | 10,081.45                            | 9259.90   | 25,894.13 | 27,374.98 | 11,735.80 | 15,452.55 |
|                                          | 2014 | 10,221.33                            | 9322.78   | 25,284.16 | 26,838.59 | 11,994.90 | 14,939.13 |
|                                          | 2015 | 10,351.43                            | 9178.34   | 27,471.13 | 28,687.12 | 12,631.38 | 14,411.03 |
|                                          | 2016 | 10,306.44                            | 9200.99   | 27,201.59 | 28,666.07 | 12,298.58 | 15,262.25 |
|                                          | 2017 | 10,368.10                            | 9269.45   | 26,576.66 | 28,221.93 | 12,318.15 | 15,001.03 |
|                                          | 2018 | 10,190.78                            | 9769.67   | 26,503.52 | 28,783.02 | 13,061.25 | 15,141.34 |
|                                          | 2019 | 10,919.86                            | 9884.16   | 26,529.86 | 26,853.94 | 11,779.24 | 16,116.61 |
|                                          | 2020 | 11,775.37                            | 10,269.26 | 24,931.05 | 27,472.60 | 12,010.03 | 14,576.43 |
| L11-20                                   | 2011 | 13,925.78                            | 7463.91   | 25,446.78 | 21,433.48 | 16,283.62 | 10,072.60 |
|                                          | 2012 | 15,268.72                            | 8173.09   | 24,095.38 | 21,319.59 | 16,992.37 | 11,517.97 |
|                                          | 2013 | 14,858.85                            | 8245.67   | 26,629.13 | 22,116.98 | 16,228.66 | 11,866.39 |
|                                          | 2014 | 14,997.85                            | 8317.66   | 25,808.57 | 21,793.75 | 17,000.71 | 11,591.56 |
|                                          | 2015 | 15,360.56                            | 8135.35   | 28,204.89 | 23,303.21 | 17,690.93 | 11,176.53 |
|                                          | 2016 | 15,397.48                            | 8145.12   | 27,825.91 | 23,272.71 | 17,186.74 | 11,796.34 |
|                                          | 2017 | 15,100.88                            | 8231.84   | 27,201.15 | 22,938.19 | 17,322.51 | 11,646.98 |
|                                          | 2018 | 14,981.03                            | 8706.37   | 27,380.25 | 23,233.82 | 18,258.99 | 11,744.81 |
|                                          | 2019 | 16,181.02                            | 8813.65   | 27,367.46 | 21,619.26 | 16,391.57 | 12,557.80 |
|                                          | 2020 | 17,018.22                            | 9097.35   | 25,761.08 | 22,377.81 | 16,923.21 | 11,411.83 |

**Table S3:** Regression model statistical information

| Types of<br>farmland-<br>converted lands | Variables                              | Area | Logistic Regression Model | R <sup>2</sup> | P-Value |
|------------------------------------------|----------------------------------------|------|---------------------------|----------------|---------|
| L01-10                                   | Temperature                            | NE   | $y=1.95x+681.036$         | 0.004          | 0.232   |
|                                          |                                        | NW   | $y=12.094x+381.399$       | 0.0045         | <0.001  |
|                                          |                                        | SW   | $y=23.232x+488.786$       | 0.274          | <0.001  |
|                                          |                                        | SC   | $y=43.034x+4.154$         | 0.573          | <0.001  |
|                                          |                                        | E    | $y=43.256x+30.298$        | 0.413          | <0.001  |
|                                          |                                        | N    | $y=13.821x+429.827$       | 0.108          | <0.001  |
|                                          | Precipitation                          | NE   | $y=0.329x+481.271$        | 0.362          | <0.001  |
|                                          |                                        | NW   | $y=0.752x+219.335$        | 0.795          | <0.001  |
|                                          |                                        | SW   | $y=0.301x+538.675$        | 0.204          | <0.001  |
|                                          |                                        | SC   | $y=0.246x+497.201$        | 0.408          | <0.001  |
|                                          |                                        | E    | $y=0.202x+498.1$          | 0.43           | <0.001  |
|                                          |                                        | N    | $y=0.766x+204.581$        | 0.579          | <0.001  |
|                                          | Density of Rural<br>Population         | NE   | $y=0.144x+704.51$         | 0.011          | 0.048   |
|                                          |                                        | NW   | $y=1.854x+403.084$        | 0.296          | <0.001  |
|                                          |                                        | SW   | $y=-0.489x+899.84$        | 0.063          | <0.001  |
|                                          |                                        | SC   | $y=-0.725x+983.141$       | 0.15           | <0.001  |
|                                          |                                        | E    | $y=-0.836x+914.902$       | 0.218          | <0.001  |
|                                          |                                        | N    | $y=0.84x+473.002$         | 0.222          | <0.001  |
|                                          | Output Value of<br>Animal<br>Husbandry | NE   | $y=-1.743x+713.884$       | 0.047          | <0.001  |
|                                          |                                        | NW   | $y=11.695x+459.792$       | 0.058          | <0.001  |
|                                          |                                        | SW   | $y=-2.234x+865.499$       | 0.014          | 0.007   |
|                                          |                                        | SC   | $y=-11.145x+947.912$      | 0.147          | <0.001  |
|                                          |                                        | E    | $y=-7.535x+780.204$       | 0.16           | <0.001  |
|                                          |                                        | N    | $y=3.487x+520.622$        | 0.034          | 0.001   |
| L11-20                                   | Temperature                            | NE   | $y=5.659x+671.169$        | 0.028          | 0.001   |
|                                          |                                        | NW   | $y=9.363x+391.926$        | 0.023          | 0.001   |
|                                          |                                        | SW   | $y=24.991x+480.998$       | 0.231          | <0.001  |
|                                          |                                        | SC   | $y=45.391x-18.635$        | 0.707          | <0.001  |
|                                          |                                        | E    | $y=41.214x+98.699$        | 0.462          | <0.001  |
|                                          |                                        | N    | $y=10.356x+445.757$       | 0.053          | <0.001  |
|                                          | Precipitation                          | NE   | $y=0.342x+485.267$        | 0.329          | <0.001  |
|                                          |                                        | NW   | $y=0.825x+180.651$        | 0.805          | <0.001  |
|                                          |                                        | SW   | $y=0.325x+533.163$        | 0.173          | <0.001  |
|                                          |                                        | SC   | $y=0.26x+501.426$         | 0.506          | <0.001  |
|                                          |                                        | E    | $y=0.183x+557.2$          | 0.436          | <0.001  |
|                                          |                                        | N    | $y=0.829x+159.76$         | 0.572          | <0.001  |
|                                          |                                        | NE   | $y=0.094x+697.187$        | 0.004          | 0.235   |

|                                        |    |                     |       |        |
|----------------------------------------|----|---------------------|-------|--------|
| Density of Rural<br>Population         | NW | $y=2.05x+381.345$   | 0.306 | <0.001 |
|                                        | SW | $y=-0.591x+930.811$ | 0.067 | <0.001 |
|                                        | SC | $y=-0.636x+993.396$ | 0.129 | <0.001 |
|                                        | E  | $y=-0.789x+940.197$ | 0.237 | <0.001 |
|                                        | N  | $y=0.653x+476.023$  | 0.118 | <0.001 |
| Output Value of<br>Animal<br>Husbandry | NE | $y=-1.973x+728.955$ | 0.051 | <0.001 |
|                                        | NW | $y=10.24x+458.59$   | 0.039 | <0.001 |
|                                        | SW | $y=-2.762x+889.932$ | 0.015 | 0.004  |
|                                        | SC | $y=-11.81x+979.116$ | 0.184 | <0.001 |
|                                        | E  | $y=-5.179x+796.575$ | 0.107 | <0.001 |
|                                        | N  | $y=1.359x+528.522$  | 0.004 | 0.213  |

**Figure S2:** Correlation between NPP and (a) temperature on L01-10, (b) temperature on L11-20, (c) precipitation on L01-10, (d) precipitation on L11-20, (e) rural population density on L01-10, (f) rural population density on L11-20, (g) animal husbandry output value on L01-10 and (h) animal husbandry output value on L11-20

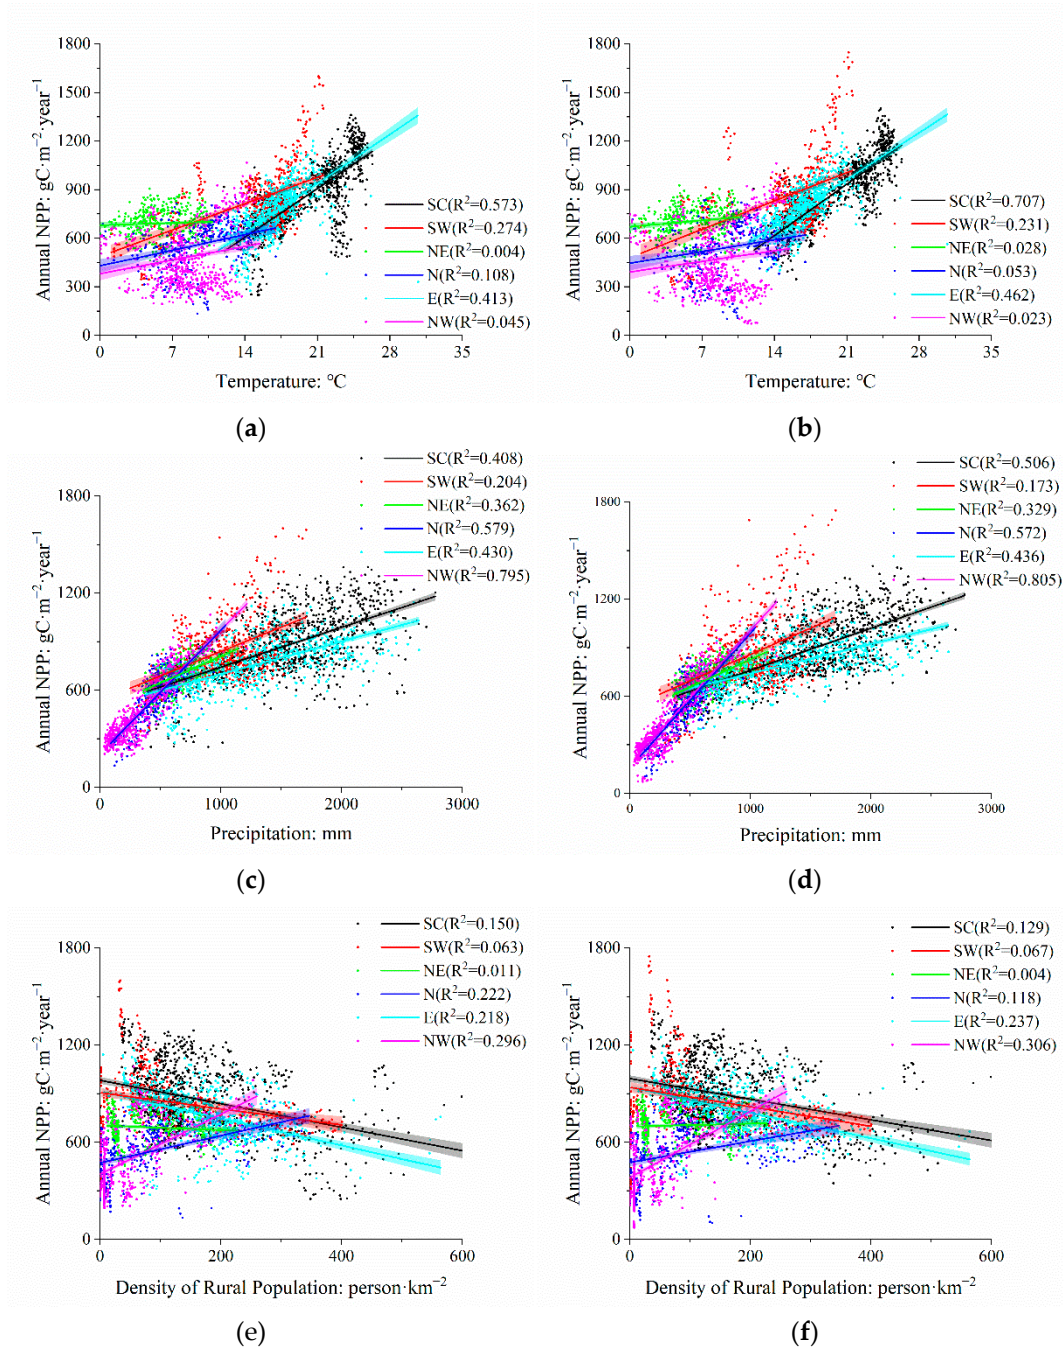

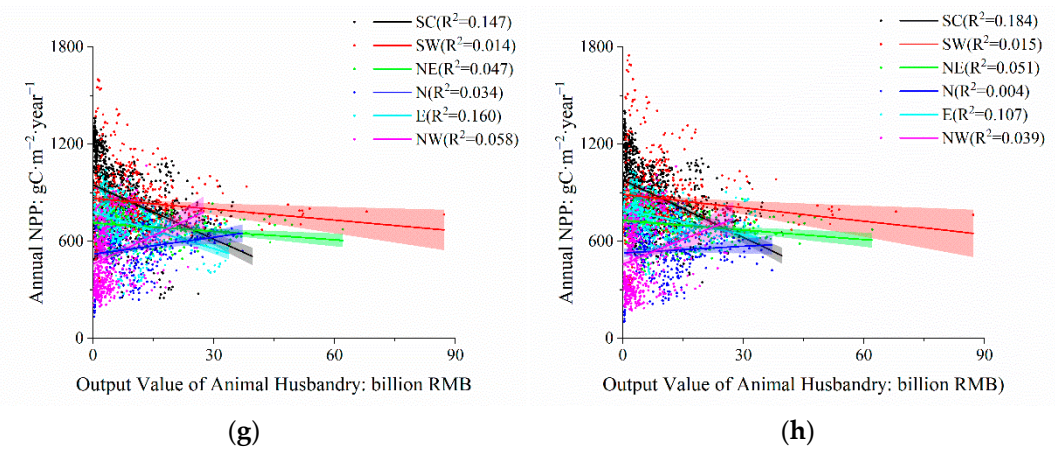



**Figure S3:** Six regions constraints between NPP and (a) rural population density on L01-10 (b) rural population density on L11-20 (c) animal husbandry output value on L01-10 in pastoral areas (d) animal husbandry output value on L11-20 in pastoral areas

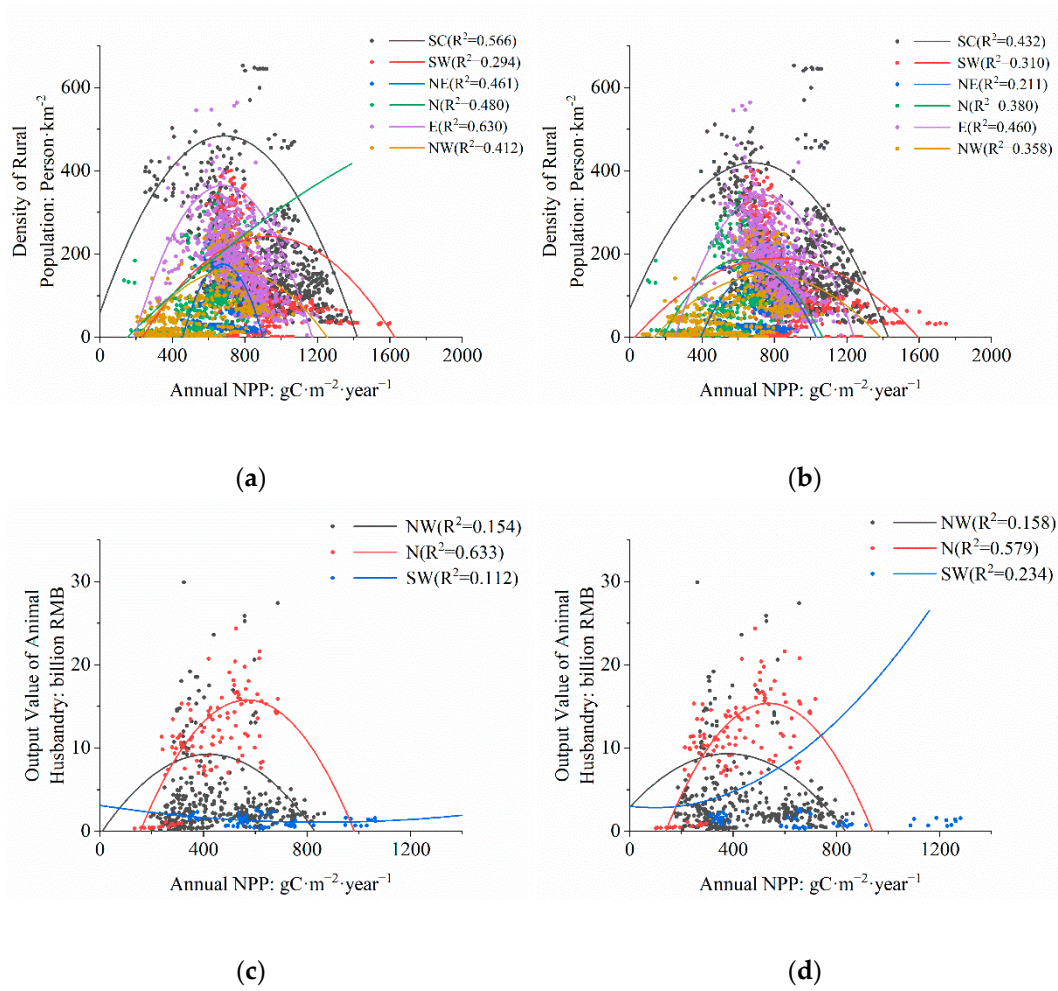

Supplement: s1 [file s1]
