# Supplementary material
Source: MDPI journal article supplement (https://www.mdpi.com/2073-445X/12/5/1078)
Supplement: s1 [file s1]

| Types of<br>farmland-<br>converted<br>lands | year | Annual NPP (GgC·year <sup>-1</sup> ) |           |           |           |           |           |
|---------------------------------------------|------|--------------------------------------|-----------|-----------|-----------|-----------|-----------|
|                                             |      | NE                                   | NW        | SW        | SC        | E         | N         |
| L01-10                                      | 2011 | 9461.97                              | 8472.94   | 25,137.94 | 26,454.68 | 11,674.56 | 13,075.41 |
|                                             | 2012 | 10,343.80                            | 9167.68   | 23,771.45 | 26,419.12 | 12,144.40 | 14,685.45 |
|                                             | 2013 | 10,081.45                            | 9259.90   | 25,894.13 | 27,374.98 | 11,735.80 | 15,452.55 |
|                                             | 2014 | 10,221.33                            | 9322.78   | 25,284.16 | 26,838.59 | 11,994.90 | 14,939.13 |
|                                             | 2015 | 10,351.43                            | 9178.34   | 27,471.13 | 28,687.12 | 12,631.38 | 14,411.03 |
|                                             | 2016 | 10,306.44                            | 9200.99   | 27,201.59 | 28,666.07 | 12,298.58 | 15,262.25 |
|                                             | 2017 | 10,368.10                            | 9269.45   | 26,576.66 | 28,221.93 | 12,318.15 | 15,001.03 |
|                                             | 2018 | 10,190.78                            | 9769.67   | 26,503.52 | 28,783.02 | 13,061.25 | 15,141.34 |
|                                             | 2019 | 10,919.86                            | 9884.16   | 26,529.86 | 26,853.94 | 11,779.24 | 16,116.61 |
|                                             | 2020 | 11,775.37                            | 10,269.26 | 24,931.05 | 27,472.60 | 12,010.03 | 14,576.43 |
| L11-20                                      | 2011 | 13,925.78                            | 7463.91   | 25,446.78 | 21,433.48 | 16,283.62 | 10,072.60 |
|                                             | 2012 | 15,268.72                            | 8173.09   | 24,095.38 | 21,319.59 | 16,992.37 | 11,517.97 |
|                                             | 2013 | 14,858.85                            | 8245.67   | 26,629.13 | 22,116.98 | 16,228.66 | 11,866.39 |
|                                             | 2014 | 14,997.85                            | 8317.66   | 25,808.57 | 21,793.75 | 17,000.71 | 11,591.56 |
|                                             | 2015 | 15,360.56                            | 8135.35   | 28,204.89 | 23,303.21 | 17,690.93 | 11,176.53 |
|                                             | 2016 | 15,397.48                            | 8145.12   | 27,825.91 | 23,272.71 | 17,186.74 | 11,796.34 |
|                                             | 2017 | 15,100.88                            | 8231.84   | 27,201.15 | 22,938.19 | 17,322.51 | 11,646.98 |
|                                             | 2018 | 14,981.03                            | 8706.37   | 27,380.25 | 23,233.82 | 18,258.99 | 11,744.81 |
|                                             | 2019 | 16,181.02                            | 8813.65   | 27,367.46 | 21,619.26 | 16,391.57 | 12,557.80 |
|                                             | 2020 | 17,018.22                            | 9097.35   | 25,761.08 | 22,377.81 | 16,923.21 | 11,411.83 |

Table S2 Total NPP for vegetation on fallow land in six regions from 2011 to 2020.
