# Supplementary material
Source: MDPI journal article supplement (https://www.mdpi.com/2073-445X/12/5/1078)
Supplement: s1 [file s1]

| Sen<br>trend<br>degree | Mann-Kendall<br>trend test | Trend<br>Categories | Trend Significance              |
|------------------------|----------------------------|---------------------|---------------------------------|
| $\beta > 0$            | $2.58 < Z$                 | 4                   | Extremely significant increase  |
|                        | $1.96 < Z \leq 2.58$       | 3                   | Significant increase            |
|                        | $1.65 < Z \leq 1.96$       | 2                   | Slightly significant increase   |
|                        | $Z \leq 1.65$              | 1                   | No significant increase         |
| $\beta = 0$            | $Z$                        | 0                   | No change                       |
| $\beta < 0$            | $Z \leq 1.65$              | -1                  | No significant reduction        |
|                        | $1.65 < Z \leq 1.96$       | -2                  | Slightly significant reduction  |
|                        | $1.96 < Z \leq 2.58$       | -3                  | Significant reduction           |
|                        | $2.58 < Z$                 | -4                  | Extremely significant reduction |

Table S1. Significance test for variation trend of NPP based on  $\beta$  and  $Z$ .
