# Supplementary material
Source: MDPI journal article supplement (https://www.mdpi.com/2073-445X/12/5/1078)
Supplement: s1 [file s1]

| Types of<br>farmland-<br>converted<br>lands | Variables                              | Area | Logistic Regression Model | $R^2$  | $P$ -Value |
|---------------------------------------------|----------------------------------------|------|---------------------------|--------|------------|
| L01-10                                      | Temperature                            | NE   | $y=1.95x+681.036$         | 0.004  | 0.232      |
|                                             |                                        | NW   | $y=12.094x+381.399$       | 0.0045 | <0.001     |
|                                             |                                        | SW   | $y=23.232x+488.786$       | 0.274  | <0.001     |
|                                             |                                        | SC   | $y=43.034x+4.154$         | 0.573  | <0.001     |
|                                             |                                        | E    | $y=43.256x+30.298$        | 0.413  | <0.001     |
|                                             |                                        | N    | $y=13.821x+429.827$       | 0.108  | <0.001     |
|                                             | Precipitation                          | NE   | $y=0.329x+481.271$        | 0.362  | <0.001     |
|                                             |                                        | NW   | $y=0.752x+219.335$        | 0.795  | <0.001     |
|                                             |                                        | SW   | $y=0.301x+538.675$        | 0.204  | <0.001     |
|                                             |                                        | SC   | $y=0.246x+497.201$        | 0.408  | <0.001     |
|                                             |                                        | E    | $y=0.202x+498.1$          | 0.43   | <0.001     |
|                                             |                                        | N    | $y=0.766x+204.581$        | 0.579  | <0.001     |
|                                             | Density of Rural<br>Population         | NE   | $y=0.144x+704.51$         | 0.011  | 0.048      |
|                                             |                                        | NW   | $y=1.854x+403.084$        | 0.296  | <0.001     |
|                                             |                                        | SW   | $y=-0.489x+899.84$        | 0.063  | <0.001     |
|                                             |                                        | SC   | $y=-0.725x+983.141$       | 0.15   | <0.001     |
|                                             |                                        | E    | $y=-0.836x+914.902$       | 0.218  | <0.001     |
|                                             |                                        | N    | $y=0.84x+473.002$         | 0.222  | <0.001     |
|                                             | Output Value of<br>Animal<br>Husbandry | NE   | $y=-1.743x+713.884$       | 0.047  | <0.001     |
|                                             |                                        | NW   | $y=11.695x+459.792$       | 0.058  | <0.001     |
|                                             |                                        | SW   | $y=-2.234x+865.499$       | 0.014  | 0.007      |
|                                             |                                        | SC   | $y=-11.145x+947.912$      | 0.147  | <0.001     |
|                                             |                                        | E    | $y=-7.535x+780.204$       | 0.16   | <0.001     |
|                                             |                                        | N    | $y=3.487x+520.622$        | 0.034  | 0.001      |
| L11-20                                      | Temperature                            | NE   | $y=5.659x+671.169$        | 0.028  | 0.001      |
|                                             |                                        | NW   | $y=9.363x+391.926$        | 0.023  | 0.001      |
|                                             |                                        | SW   | $y=24.991x+480.998$       | 0.231  | <0.001     |
|                                             |                                        | SC   | $y=45.391x-18.635$        | 0.707  | <0.001     |
|                                             |                                        | E    | $y=41.214x+98.699$        | 0.462  | <0.001     |
|                                             |                                        | N    | $y=10.356x+445.757$       | 0.053  | <0.001     |
|                                             | Precipitation                          | NE   | $y=0.342x+485.267$        | 0.329  | <0.001     |

|                                        |    |                     |       |        |
|----------------------------------------|----|---------------------|-------|--------|
|                                        | NW | $y=0.825x+180.651$  | 0.805 | <0.001 |
|                                        | SW | $y=0.325x+533.163$  | 0.173 | <0.001 |
|                                        | SC | $y=0.26x+501.426$   | 0.506 | <0.001 |
|                                        | E  | $y=0.183x+557.2$    | 0.436 | <0.001 |
|                                        | N  | $y=0.829x+159.76$   | 0.572 | <0.001 |
| Density of Rural<br>Population         | NE | $y=0.094x+697.187$  | 0.004 | 0.235  |
|                                        | NW | $y=2.05x+381.345$   | 0.306 | <0.001 |
|                                        | SW | $y=-0.591x+930.811$ | 0.067 | <0.001 |
|                                        | SC | $y=-0.636x+993.396$ | 0.129 | <0.001 |
|                                        | E  | $y=-0.789x+940.197$ | 0.237 | <0.001 |
|                                        | N  | $y=0.653x+476.023$  | 0.118 | <0.001 |
|                                        | NE | $y=-1.973x+728.955$ | 0.051 | <0.001 |
| Output Value of<br>Animal<br>Husbandry | NW | $y=10.24x+458.59$   | 0.039 | <0.001 |
|                                        | SW | $y=-2.762x+889.932$ | 0.015 | 0.004  |
|                                        | SC | $y=-11.81x+979.116$ | 0.184 | <0.001 |
|                                        | E  | $y=-5.179x+796.575$ | 0.107 | <0.001 |
|                                        | N  | $y=1.359x+528.522$  | 0.004 | 0.213  |

Table S3 Regression model statistical information
